1 **Diverse *Escherichia coli* lineages, from domestic animals and humans in a household, carry**  
2 **colistin resistance gene *mcr-1* in Ecuador**

3

4 María Fernanda Loayza, <sup>a#</sup>, Liseth Salinas <sup>a</sup>, Fernando Villavicencio <sup>b</sup>, Tamayo Rafael <sup>b</sup>, Stephanie  
5 Salas <sup>b</sup>, José Villacís <sup>b</sup>, Carolina Satan <sup>b</sup>, Liliana Ushiña <sup>b</sup>, Ruth Rivera <sup>b</sup>, Olga Muñoz <sup>b</sup>, Jeannete  
6 Zurita <sup>c</sup>, Tijet Nathalie <sup>d</sup>, Roberto Melano <sup>d,e</sup>, Jorge Reyes <sup>f</sup>, Gabriel Trueba <sup>a</sup>

7

8 Instituto de Microbiología, Colegio de Ciencias Biológicas y Ambientales, Universidad San  
9 Francisco de Quito, Quito, Ecuador <sup>a</sup>; Instituto Nacional de Investigación en Salud Pública “Dr.  
10 Leopoldo Izquieta Pérez”, Quito, Ecuador <sup>b</sup>; Unidad de Investigaciones en Biomedicina Zurita &  
11 Zurita Laboratorios, Quito, Ecuador <sup>c</sup>; Public Health Ontario Laboratory, Toronto, Ontario, Canada  
12 <sup>d</sup>; Department of Laboratory Medicine and Pathobiology, University of Toronto, Toronto, Ontario,  
13 Canada <sup>e</sup>; Facultad de Ciencias Químicas, Universidad Central del Ecuador, Quito, Ecuador <sup>f</sup>

14

15 Running Head: Diverse commensal *E. coli* lineages carrying *mcr-1* gen

16

17 #Address correspondence to María Fernanda Loayza, [mfloayzav@usfq.edu.ec](mailto:mfloayzav@usfq.edu.ec)

18

19

20

21

22

## 23 **Abstract**

24 The aim of this study was to investigate the presence of *Escherichia coli* carrying *mcr-1* gene  
25 in domestic animals close to a child who suffered a peritoneal infection by a *mcr-1* positive  
26 *E. coli*. Rectal or cloacal swabs and fecal samples from domestic animals were plated on  
27 selective media to isolate colistin-resistant *E. coli* and isolates were submitted to detection of  
28 *mcr-1* gene, pulsed field gel electrophoresis (PFGE), multi-locus sequence typing (MLST),  
29 replicon typing and S1-PFGE. Four *mcr-1* positive *E. coli* isolates (from chicken, turkey and  
30 dog) were recovered. No shared PFGE pattern or MLST sequence type were observed among  
31 isolates. A 60Kb IncI1 $\gamma$  *mcr-1*-carrying plasmid was detected in all isolates. Our results  
32 suggest that *mcr-1* gene was horizontally disseminated amongst different lineages of *E. coli*  
33 from domestic animals in the child's household.

## 34 **Importance**

35 Horizontally transferable colistin resistance (*mcr-1* gene) is thought to have originated in  
36 domestic animals and transferred to humans through meat and dairy products. In the present  
37 report we show evidence that the *mcr-1* gene could be transferred to different *E. coli* strains  
38 colonizing different hosts (humans and pets) in the same household.

## 39 **Introduction**

40 Domestic animals are important source of antibiotic resistant bacteria (and genes) which can be  
41 transmitted to humans through the food chain and direct contact (1). Plasmids and other mobile  
42 genetic elements (MGEs) are involved in the transmission of antimicrobial resistance among  
43 different bacterial genera colonizing different animal species (2, 3).

44 The first report of a colistin resistance (CR) gene carried by plasmids (*mcr-1*) came from China in  
45 2015 (4). This gene codes for a phosphoethanolamine transferase (MCR-1), which modifies the  
46 lipid A moiety in the outer membrane of Gram negative bacteria and confers resistance to  
47 polymyxins (4, 5). Among Enterobacteriaceae different *mcr* gen groups (1-5) could be transferred by  
48 mobile elements (6–8) and have been detected in humans, food animals, environmental samples in  
49 several countries, in different bacterial species and in several plasmid types (9). Enterobacteriaceae  
50 has been found as the main *mcr* reservoir (6–8). The gene is easily transferred between commensal  
51 *E. coli* colonizing domestic animals and humans (7, 10) and opportunistic pathogens such as *E.*  
52 *coli* ST3941 (11) or *Klebsiella pneumoniae* ST512 KPC-3 (7, 12, 13).

53

54 In Ecuador, Ortega *et al.* have described the isolation of a colistin resistant *E. coli* carrying *mcr-1*  
55 from the peritoneal liquid in a child with complicated peritonitis (14). We investigated the *mcr-1*  
56 gene in *E. coli* isolates from domestic animals in this child's household.

## 57 **Results**

58 Four colistin resistant *E. coli* isolates were recovered from a dog (2 strains), a turkey (1 strain) and  
59 a chicken (1 strain). Susceptibility test for each strain is shown in **Table 1**. All CR isolates (colistin  
60 (MIC >4 µg/mL) were also resistant to ceftriaxone (MIC ≥64 µg/mL) and ciprofloxacin (MIC ≥4  
61 µg/mL). Additionally, dog isolates were resistant to ampicillin/sulbactam (MIC ≥32 µg/mL) and one  
62 of their isolates were resistant to gentamicin (MIC ≥16 µg/mL).

63 Sequenced PCR products showed to be identical among them and close related to *mcr-1* sequences  
64 that were previously reported (NCBI Accession number: KX11520.1, KX011521, KU935449.1,  
65 KU935446.1, KU935447, NG050417, KY013597).

66 Both PFGE and MLST indicated that CR *E. coli* isolates from domestic animals and the child (14)  
67 were different (Figure 1, Table 1). Sequence types (STs) carrying the *mcr-1* gene in the patient was  
68 ST609 and in the animal samples ST3941, 2170 and 1630. The isolates recovered from chicken and  
69 turkey also harbored *bla*<sub>CTX-M-65</sub> (the one from turkey was *bla*<sub>TEM-1</sub> as well), and the 2 *E. coli* from  
70 the dog were positive for *bla*<sub>CTX-M-3</sub> and *bla*<sub>TEM-1</sub> genes. All CR isolates from domestic animals in  
71 the household and the isolate from the child had an IncI1 $\gamma$  plasmid (Table 1). We were unable to  
72 transfer the *mcr-1* gene using the conditions described in methods section. S1-PFGE showed a  $\approx$   
73 60Kb plasmid positive for *mcr-1* gene in all isolates (from animal and human) (Figure 1).

## 74 Discussion

75 *E. coli* genetic diversity has been studied in different environments showing no clear association  
76 patterns among different sources (15). In this study, colistin resistant *E. coli* strains isolated from  
77 different sources belonged to different lineages and no one was comparable with child isolate despite  
78 of they have an identical sequence.

79 *E. coli* ST 609 (child strain) has been previously detected in human (commensal and opportunistic  
80 pathogens), and water isolates in Spain, Argentina, United States, Vietnam, Netherlands, Australia,  
81 and Norway. ST 3941(chicken strain) has been identified in commensal bacteria from livestock and  
82 poultry in China and Vietnam farms, and *E. coli* ST 2170 (turkey strain) has been reported as an  
83 opportunistic pathogen causing septicemia in Japan and in healthy poultry farms in Vietnam. ST 1630  
84 (Dog strains) was isolated from chickens in Denmark and United States (reported data in  
85 <http://mlst.ucc.ie/mlst/dbs/Ecoli>; last accessed December 8, 2017). Moreover, ST 1630 was also  
86 isolated from poultry in Japan (16). These data show the diverse and spread sources of *E. coli* strains  
87 detected and support the idea that successful mobile genetic elements could be responsible of

88 antimicrobial resistance transference among dominant strains of commensal bacteria in different  
89 niches.

90 We were unable to transfer the *mcr-1* gene to an acceptor, sodium azide resistant *E. coli*. Previous  
91 reports have described a low transfer frequency of *mcr-1*-carrying plasmids that could depends of  
92 plasmid type (16). However, we cannot discard that the conditions used in our study were not the  
93 optimal for their horizontal transfer.

94 Using a specific *mcr-1* probe, one of the isolates (from turkey) showed two positive bands by  
95 Southern blot analysis: the common plasmid (~61 kb) and another one at ~140 kb. Li R *et al*  
96 (2016), have reported double plasmid carrying *mcr-1* gene in commensal *E. coli* strains isolated  
97 from healthy pigs in China farms (17, 18). The genetic analysis of those plasmids showed a  
98 composite transposon Tn6330 (2 copies of IS*ApII* flanking the *mcr-1* gene) that can form a circular  
99 intermediate which mediates the insertion of the *mcr-1* gene cassette into the IncHI2 plasmid.  
100 Further analysis is required to describe the *mcr-1* genetic environment and complete structure of  
101 plasmids from *E. coli* strains isolated in our study.

102 Both S1-PGFE and replicon typing suggest that the *mcr-1* gene was present in the same plasmid in  
103 all CR isolates (from domestic animals and human). It is probable that  $\approx$  60Kb plasmids were  
104 responsible for the transference of colistin resistance; previous reports have shown transmission of  
105 antibiotic resistance from bacteria in domestic animals to human bacteria is carried out by plasmids  
106 and not by antibiotic resistant clones (3).

107 Our study corroborates the notion that Enterobacteriaceae colonizing intestines in domestic animals  
108 (including companion animals) could be reservoir of *mcr-1* gene (2, 19–22) . There was no  
109 evidence of colistin treatment in animals sampled, however, the presence of this type of antibiotic

110 in animal feed and supplements in Ecuador prevents us from rule out antibiotic selection of CR  
111 clones.

## 112 **Materials and Methods**

### 113 *2.1 E. coli strain isolation and MIC determination*

114 A cross – sectional study was conducted to detect commensal *E. coli* carrying *mcr-1* gene. Thirty-  
115 two fecal samples from soil and ten rectal or cloacal swabs were taken from rabbits (n= 2), guinea  
116 pigs (n= 2), dogs (n= 2) and chickens (n= 4). Fecal samples (n=32) from soil were placed in sterile  
117 reservoirs and swabs were placed in Tryptic Soy Broth (TSB, BD<sup>TM</sup>) (19). Samples were  
118 transported to the Antimicrobial Resistance Laboratory in the Instituto Nacional de Investigación en  
119 Salud Pública "Dr. Leopoldo Izquieta Perez", Quito. Samples were plated on Mac Conkey Agar  
120 plates (MKL, BD<sup>TM</sup>) supplemented with 2 µg/mL of colistin methansulfonate (RICHET®) (20).  
121 Identification and antimicrobial susceptibility profiles of the CR isolates were performed using the  
122 VITEK®2 compact (bioMérieux) with AST 272 card. Colistin minimal inhibitory concentration  
123 (MIC) was performed using Sensititre<sup>TM</sup> (23).

### 124 *2.2 Conjugation assay*

125 Conjugation was performed using CR *E. coli* isolates as donor strains and *E. coli* J53 strain (sodium  
126 azide-resistant) as recipient (17). Trans-conjugant selection was performed in Trypticase<sup>TM</sup> soy  
127 agar (Difco BD) with colistin (0.5µg/mL) and sodium azide (100 µg/mL) (24).

128

### 129 *2.3 Molecular typing*

130 PCR was performed to detect *mcr* gene (4); amplicons were sequence and aligned using *mcr-1*  
131 (NG\_055582.1), *mcr-2* (NG\_051171.1), *mcr-3* ( NG\_056184.1), *mcr-4*( MG822665.1), *mcr-5*  
132 (MG384740.1) accession numbers with Geneius software. Pulsed field gel electrophoresis (PFGE)  
133 (25) and multilocus sequence typing (MLST) was performed on seven housekeeping genes to  
134 define clonal relatedness (26). Replicon typing was performed using a commercial kit (PBRT KIT,  
135 DIATHE, Fano, Italy) (20, 27, 28).  $\beta$ -lactamase genes (*bla*<sub>CTX-M-1</sub>, *bla*<sub>TEM</sub>, *bla*<sub>SHV</sub>) were detected  
136 using primers previously described (29). Briefly, 12,5mL of GoTaq ® Green Master Mix  
137 (Promega, Madison, USA) were mixed with 1 $\mu$ L of upstream primer, 10 $\mu$ M, 1 $\mu$ L of downstream  
138 primer, 10 $\mu$ M, 1 $\mu$ L of DNA template and 9,5  $\mu$ L of Nuclease-free water to complete a 25 $\mu$ L of  
139 reaction volume. The reaction mix were amplified using 2-minute of initial denaturation at 94°C  
140 followed by 40 cycles of DNA denaturation at 94°C (40 sec), annealing at 60°C (40sec) and  
141 extension at 72°C (1min). The final elongation step at 72°C for 5 min. Amplicons were detected by  
142 electrophoresis in a 2% agarose gel. For complete amplification and sequencing of the detected  
143 resistance genes, primers and conditions previously described were used (30).

#### 144 *S1-PFGE and Southern blot.*

145 Plasmid content of each *E. coli* isolate and their estimated sizes were determined by S1  
146 endonuclease-digested genomic DNA and PFGE (S1-PFGE). Briefly, genomic DNA agarose plugs  
147 of each isolate were partially digested with the endonuclease S1(31). DNA bands were separated by  
148 PFGE under previously described conditions (32). Plasmids were transferred and immobilized on a  
149 nylon membrane and identified by Southern blot analysis, using specific *mcr-1* digoxigenin-labeled  
150 probes (Roche Diagnostics).

151

## 152 **Conclusions**

153 Our study suggests a polyclonal dissemination of *mcr-1* gene in *E. coli* domestic animals and  
154 humans in an Ecuadorian household. A 60Kb IncI1 $\gamma$  plasmid carried the *mcr-1* gene in this study,  
155 which may have been transferred among different strains colonizing different hosts. This study  
156 supports the current notion that mobile gene elements are more important than bacterial clones in  
157 the transmission of antibiotic resistance genes from the microbiota in domestic animals to human  
158 microbiota (33).

159 Our results highlight the importance of controlling the use of antibiotics in domestic animals and  
160 possibly the need for more studies of AR in isolates and mobile genetic elements in them.

## 161 **Funding**

162 This study was funded by The Instituto Nacional de Investigación en Salud Pública "Dr.  
163 Leopoldo Izquieta Perez", Quito – Ecuador and Instituto de Microbiología, Universidad  
164 San Francisco de Quito.

165 **Ethical approval:** No required

166 **Competing interest:** The authors declare that they don't have any conflict of interests.

167

## 168 **References**

- 169 1. Pompa C, Rantala M, Greko C, Baptiste K, Catry B, Van Duijkeren E, Mateus ALP,  
170 Moreno MA, Pyörälä S, Ruzauskas M, Sanders P, Teale C, Threlfall J, Kunsagi Z,  
171 Torren\_Edo J, Jukes H, Törneke K. 2016. Public health risk of antimicrobial  
172 resistance transfer from companion animals. *J Antimicrob Chemother* 1–12.
- 173 2. Mukerji S, O’Dea M, Barton M, Kirkwood R, Lee T, Abraham S. 2017.  
174 Development and transmission of antimicrobial resistance among Gram-negative



- 175 bacteria in animals and their public health impact. *Essays Biochem* 61:23–35.
- 176 3. De Been M, Lanza V, De Toro M, Scharringa J, Dohmen W, Du Y, Hu J, Lei Y, Li  
177 N, Tooming-Klunderud A, Heederik DJJ, Fluit AC, Bonten MJM, Willems RJL,  
178 Cruz F De, Schaik W Van. 2014. Dissemination of Cephalosporin Resistance Genes  
179 between *Escherichia coli* Strains from Farm Animals and Humans by Specific  
180 Plasmid Lineages. *Plos Genet* 10.
- 181 4. Liu YY, Wang Y, Walsh TR, Yi LX, Zhang R, Spencer J, Doi Y, Tian G, Dong B,  
182 Huang X, Yu LF, Gu D, Ren H, Chen X, Lv L, He D, Zhou H, Liang Z, Liu JH,  
183 Shen J. 2016. Emergence of plasmid-mediated colistin resistance mechanism MCR-1  
184 in animals and human beings in China: A microbiological and molecular biological  
185 study. *Lancet Infect Dis* 16:161–168.
- 186 5. Poirel L, Jayol A, Nordmann P. 2017. Polymyxins: Antibacterial activity,  
187 susceptibility testing and resistance mechanisms encoded by plasmid or  
188 chromosomes. *Clin Microbiol Rev* 30:557–596.
- 189 6. Schwarz S, Johnson AP. 2016. Transferable resistance to colistin: a new but old  
190 threat. *J Antimicrob Chemother* dkw274.
- 191 7. Gao R, Hu Y, Li Z, Sun J, Wang Q, Lin J, Ye H, Liu F, Srinivas S, Li D, Zhu B, Liu  
192 Y-H, Tian G-B, Feng Y. 2016. Dissemination and mechanism for the MCR-1  
193 colistin resistance. *PLOS Pathog* 12:e1005957.
- 194 8. Lescat M, Poirel L, Nordmann P. 2018. Rapid multiplex PCR for detection of mcr-1  
195 to 5 genes. *Diagn Microbiol Infect Dis*.
- 196 9. Skov RL, Monnet DL. 2016. Plasmid-mediated colistin resistance (mcr-1 gene);  
197 three months later, the story unfolds. *Euro Surveill* 21:1–6.
- 198 10. Poirel L, Nordmann P. 2016. Emerging plasmid-encoded colistin resistance: the

- 199 animal world as the culprit? J Antimicrob Chemother dkw074.
- 200 11. Corbella M, Mariani B, Ferrari C, Comandatore F, Scaltriti E, Marone P, Cambieri  
201 P. Three cases of mcr-1-positive colistin-resistant *Escherichia coli* bloodstream  
202 infections in Italy.
- 203 12. Di Pilato V, Arena F, Carlo T, Cannatelli A, Angelis LH De, Fortunato S, Giani T,  
204 Menichetti F, Rossolini GM. 2016. mcr-1,2, a new mcr variant carried a transferable  
205 plasmid from a colistin-resistant KPC Carbapenemase-producing *Klebsiella*  
206 *pneumoniae* strain of sequence type 512. Antimicrob Agents Chemother 60:25–34.
- 207 13. Castanheira M, Griffin MA, Deshpande LM, Mendes RE, Jones RN, Flamm RK.  
208 2016. Detection of mcr-1 among *Escherichia coli* clinical isolates collected  
209 worldwide as part of the SENTRY Antimicrobial Surveillance Program during 2014-  
210 2015. Antimicrob Agents Chemother 316:806–807.
- 211 14. Ortega D, Barba P, Zurita J. 2016. Colistin-resistant *Escherichia coli* clinical isolate  
212 harbouring the mcr-1 gene in Ecuador. Epidemiol Infect 1–4.
- 213 15. Tenaillon O, Skurnik D, Picard B, Denamur E. 2010. The population genetics of  
214 commensal *Escherichia coli*. Nat Rev Microbiol 8.
- 215 16. Hiki M, Usui M, Akiyama T, Kawanishi M, Tsuyuki M, Imamura S, Sekiguchi H,  
216 Kojima A, Asai T. 2014. Phylogenetic grouping, epidemiological typing, analysis of  
217 virulence genes, and antimicrobial susceptibility of *Escherichia coli* isolated from  
218 healthy broilers in Japan. Ir Vet J 67:14.
- 219 17. Li R, Xie M, Lv J, Wai-Chi Chan E, Chen S. 2016. Complete genetic analysis of  
220 plasmids carrying mcr-1 and other resistance genes in an *Escherichia coli* isolate of  
221 animal origin. J Antimicrob Chemother dkw509.
- 222 18. Li R, Xie M, Zhang J, Yang Z, Liu L, Liu X, Zheng Z, Chan EW-CC, Chen S. 2017.

- 223 Genetic characterization of *mcr-1*-bearing plasmids to depict molecular mechanisms  
224 underlying dissemination of the colistin resistance determinant. *J Antimicrob*  
225 *Chemother* 72:393–401.
- 226 19. Agga GE, Schmidt JW, Arthur TM. 2016. Effects of In - Feed Chlortetracycline  
227 prophylaxis of beef cattle on animal health and Antimicrobial -Resistant *Escherichia*  
228 *coli*. *Appl Environ Microbiol*.
- 229 20. do Monte DFM, Mem A, Fernandes MR, Cerdeira L, Esposito F, Galvão JA, Franco  
230 BDGM, Lincopan N, Landgraf M. 2017. Chicken Meat as Reservoir of Colistin-  
231 Resistant *Escherichia coli* Carrying *mcr-1* Genes in South America. *Antimicrob*  
232 *Agents Chemother* AAC.02718-16.
- 233 21. Brown DFJ, Wootton M, Howe RA. 2016. Antimicrobial susceptibility testing  
234 breakpoints and methods from BSAC to EUCAST 3–5.
- 235 22. Lei L, Wang Y, Schwarz S, Waish T, Ou yanran, Wu Y, Li M, Shen Z. 2017. *mcr-1*  
236 in Enterobacteriaceae from companion animals, Beijing, China, 2012-2016. *Emerg*  
237 *Infect Dis* 23:710–1.
- 238 23. Committee TE, Testing AS, Changes N, Pseudomonas E. 2015. European  
239 Committee on Antimicrobial Susceptibility Testing Breakpoint tables for  
240 interpretation of MICs and zone diameters European Committee on Antimicrobial  
241 Susceptibility Testing Breakpoint tables for interpretation of MICs and zone  
242 diameters.  
243 [http://www.eucast.org/fileadmin/src/media/PDFs/EUCAST\\_files/Breakpoint\\_tables/](http://www.eucast.org/fileadmin/src/media/PDFs/EUCAST_files/Breakpoint_tables/v_50_Breakpoint_Table_01.pdf)  
244 [v\\_50\\_Breakpoint\\_Table\\_01.pdf](http://www.eucast.org/fileadmin/src/media/PDFs/EUCAST_files/Breakpoint_tables/v_50_Breakpoint_Table_01.pdf) 0–77.
- 245 24. Poirel L, Kieffer N, Brink A, Coetze J, Jayol A, Nordmann P. 2016. Genetic features  
246 of MCR-1-producing colistin-resistant *Escherichia coli* isolates in South Africa.

- 247 Antimicrob Agents Chemother 60:4394–4397.
- 248 25. Pulsenet International. 2013. Standard Operating Procedure for Pulsenet Pfg of  
249 *Escherichia coli* O157:H7, *Escherichia coli* Non-O157 (Stec), Salmonella Serotypes,  
250 Shigella Sonneiand Shigella Flexneri 157:1–14.
- 251 26. Wirth T, Falush D, Lan R, Colles F, Mensa P, Wieler LH, Karch H, Reeves PR,  
252 Maiden MCJ, Ochman H, Achtman M. 2006. Sex and virulence in *Escherichia coli*:  
253 An evolutionary perspective. Mol Microbiol 60:1136–1151.
- 254 27. Carattoli A. 2013. Plasmids and the spread of resistance. Int J Med Microbiol  
255 303:298–304.
- 256 28. Tijet N, Faccone D, Rapoport M, Seah C, Pasterán F, Ceriana P, Albornoz E, Corso  
257 A, Petroni A, Melano RG. 2017. Molecular characteristics of mcr-1-carrying  
258 plasmids and new mcr-1 variant recovered from polyclonal clinical *Escherichia coli*  
259 from Argentina and Canada. PLoS One 12:e0180347.
- 260 29. Mohammed H, Fakhr AE, Mohammed H, Al E, Abdel W, Hassanein G. 2016.  
261 Spread of TEM, VIM, SHV, and CTX-M b- lactamases in Imipenem-Resistant  
262 Gram-Negative Bacilli Isolated from Egyptian Hospitals. Int J Microbiol 2016:15.
- 263 30. Tijet N, Andres P, Chung C, Lucero C, Group W-A, Low DE, Galas M, Corso A,  
264 Petroni A, Melano RG. 2011. rmtD2, a new allele of a 16S rRNA methylase gene,  
265 has been present in Enterobacteriaceae isolates from Argentina for more than a  
266 decade. Antimicrob Agents Chemother 55:904–909.
- 267 31. Barton BM, Harding GP, Zuccarelli AJ. 1995. A General Method for Detecting and  
268 Sizing Large Plasmids. Anal Biochem 226:235–240.
- 269 32. Borgia S, Lastovetska O, Richardson D, Eshaghi A, Xiong J, Chung C, Baqi M,  
270 McGeer A, Ricci G, Sawicki R, Pantelidis R, Low DE, Patel SN, Melano RG. 2012.

- 271            Outbreak of Carbapenem-Resistant Enterobacteriaceae Containing blaNDM-1,  
272            Ontario, Canada. Clin Infect Dis 55:e109–e117.
- 273    33.    Szmolka A, Nagy B. 2013. Multidrug resistant commensal *Escherichia coli* in  
274            animals and its impact for public health. Front Microbiol 4:1–13.
- 275
- 276

277 **Table 1.** Antibiotic susceptibility profiles and molecular analyses (PCR for *bla* genes detection, MLST and Replicon typing) of *mcr-1*-positive *E. coli*  
 278 isolates.

| Strain origin | Antimicrobial resistance | MLST     | PCR                                                          | Plasmid Inc group |    |   |     |     |     |      |   |    |   |     |
|---------------|--------------------------|----------|--------------------------------------------------------------|-------------------|----|---|-----|-----|-----|------|---|----|---|-----|
|               |                          | ST       | <i>bla</i> genes                                             | HI1               | I2 | N | FIA | FIB | I1y | FIIS | R | X1 | Y | FII |
| Chicken       | COL, CRO, CIP            | 3941     | <i>bla</i> <sub>CTX-M-65</sub>                               | -                 | +  | - | +   | -   | +   | -    | - | -  | - | -   |
| Turkey        | COL, CRO, CIP            | 1630     | <i>bla</i> <sub>TEM-1</sub> ; <i>bla</i> <sub>CTX-M-65</sub> | +                 | -  | - | -   | -   | +   | -    | - | -  | - | -   |
| Dog1          | COL, SAM, CRO, CIP       | 2170     | <i>bla</i> <sub>TEM-1</sub> ; <i>bla</i> <sub>CTX-M-3</sub>  | -                 | +  | - | -   | +   | +   | +    | - | -  | + | +   |
| Dog2          | COL, SAM, CRO, CIP, GN   | 2170     | <i>bla</i> <sub>TEM-1</sub> ; <i>bla</i> <sub>CTX-M-3</sub>  | -                 | -  | - | -   | -   | +   | -    | - | -  | - | -   |
| Child*        | COL, CAZ, CRO, FEP, CIP  | 609 [13] | <i>bla</i> <sub>CTX-M-55</sub> [13]                          | -                 | +  | + | -   | -   | +   | -    | + | +  | - | -   |

279 COL, colistin; SAM, ampicillin/sulbactam; CAZ, ceftazidime; CRO, ceftriaxone; FEP, cefepime; GN, gentamicin; CIP, ciprofloxacin.

280 ST, sequence type obtained by MLST analysis; *bla* genes, β-lactamase genes; Poultry TC, Transconjugant strain obtained with conjugation using

281 chicken CR *E. coli* isolate as donator and *E. coli* J53 as receptor strain. Replicon typing analysis was performed with PBRT KIT (DIATHEVA):

282 only positive Inc groups in the overall analysis are included. \* isolate reported by Ortega *et al*

283



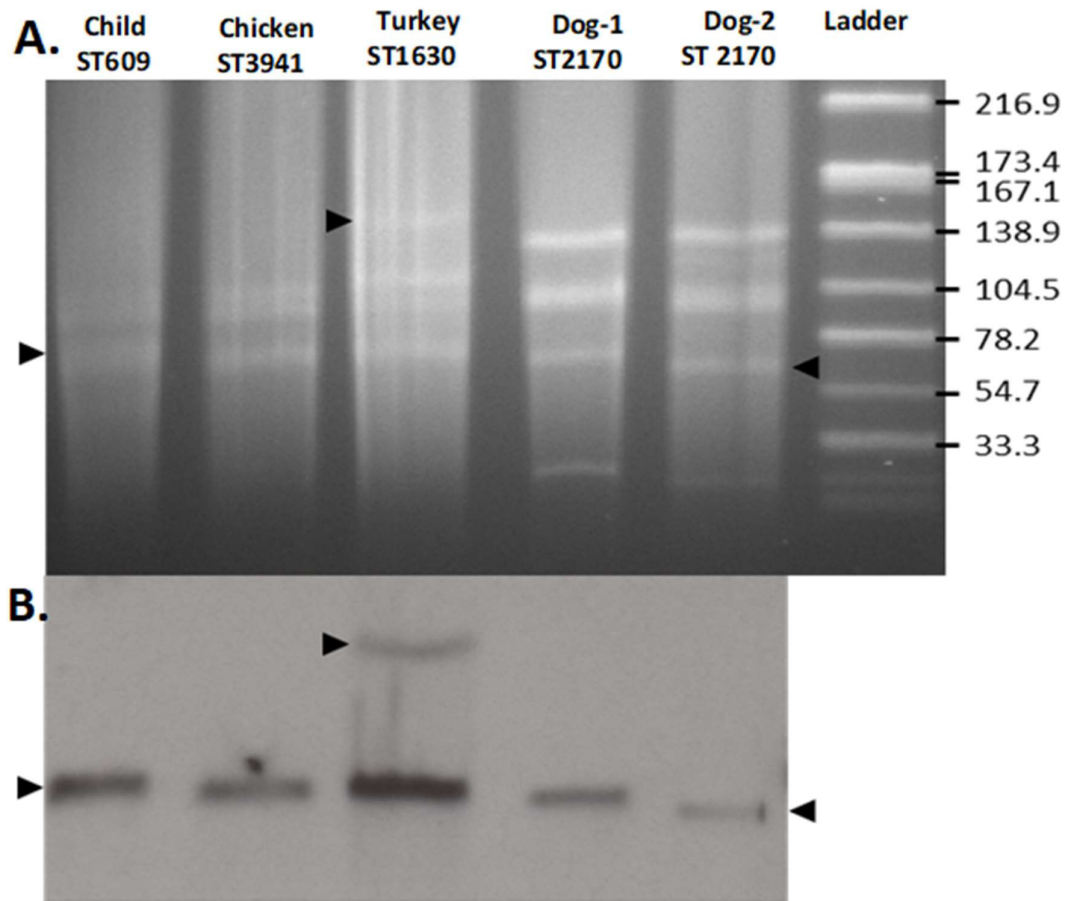

Figure 1. Identification of *mcr-1*-harboring plasmids. (A) S1- PFGE plasmid profiles of the patient and animals *mcr-1* positive *E. coli*. (B) Southern blot using *mcr-1* probe. Arrows indicate the plasmids carrying *mcr-1* gene. Ladder, reference standard *Salmonella enterica* serotype Braenderup strain H9812 restricted with *Xba*I (sizes are given in kilobases)
